# Supplementary material for: Noble gas hydrides: theoretical prediction of the first group of anionic species
Source: Royal Society of Chemistry journal article supplement (doi:10.1039/d3cp05623f), 2024-01-01
Supplement: d3cp05623f1.pdf [file d3cp05623f1.pdf]

*Electronic Supplementary Information for*

**Noble gas hydrides: theoretical prediction of a first group of  
anionic species**

Stefano Borocci,<sup>ab</sup> Patrizio Cecchi,<sup>a</sup> Felice Grandinetti,<sup>\*ab</sup> Nico Sanna<sup>ac</sup> and  
Costantino Zazza<sup>a</sup>

to be published in *Physical Chemistry Chemical Physics*

<sup>a</sup> *Dipartimento per la Innovazione nei sistemi Biologici, Agroalimentari e Forestali (DIBAF),  
Università della Tuscia, L.go dell'Università, s.n.c., 01100 Viterbo (Italy).*

*E-mail: fgrandi@unitus.it*

<sup>b</sup> *Istituto per i Sistemi Biologici del CNR (ISB), Sede di Roma - Meccanismi di Reazione c/o  
Dipartimento di Chimica, Sapienza Università di Roma, P.le A. Moro 5, Rome (Italy)*

<sup>c</sup> *Istituto per la Scienza e Tecnologia dei Plasmi del CNR (ISTP), Via Amendola  
122/D, 70126 Bari (Italy)*

**Table S1** CCSD(T)/aVTZ, MP2/aVTZ, and B3LYP/aVTZ optimized bond lengths (Å) of the linear HNgBeO<sup>-</sup> and NgBeO (Ng = Ar, Kr, Xe, Rn)

| Species                | Ng | Method       | Ng-Be  | Be-O   | Ng-H   |
|------------------------|----|--------------|--------|--------|--------|
| H-Ng-Be-O <sup>-</sup> | Ar | CCSD(T)/aVTZ | 2.0173 | 1.3528 | 2.5567 |
|                        |    | MP2/aVTZ     | 2.0072 | 1.3623 | 2.5389 |
|                        |    | B3LYP/aVTZ   | 2.0616 | 1.3388 | 2.5148 |
|                        | Kr | CCSD(T)/aVTZ | 2.1830 | 1.3553 | 2.5764 |
|                        |    | MP2/aVTZ     | 2.1698 | 1.3648 | 2.5574 |
|                        |    | B3LYP/aVTZ   | 2.2367 | 1.3415 | 2.5263 |
|                        | Xe | CCSD(T)/aVTZ | 2.4015 | 1.3595 | 2.5698 |
|                        |    | MP2/aVTZ     | 2.3848 | 1.3689 | 2.5503 |
|                        |    | B3LYP/aVTZ   | 2.4538 | 1.3453 | 2.5333 |
|                        | Rn | CCSD(T)/aVTZ | 2.5234 | 1.3622 | 2.5267 |
|                        |    | MP2/aVTZ     | 2.5035 | 1.3716 | 2.5048 |
|                        |    | B3LYP/aVTZ   | 2.5619 | 1.3472 | 2.5105 |
| Ng-Be-O                | Ar | CCSD(T)/aVTZ | 2.0752 | 1.3413 |        |
|                        |    | MP2/aVTZ     | 2.0784 | 1.3513 |        |
|                        |    | B3LYP/aVTZ   | 2.0710 | 1.3240 |        |
|                        | Kr | CCSD(T)/aVTZ | 2.2119 | 1.3424 |        |
|                        |    | MP2/aVTZ     | 2.2151 | 1.3523 |        |
|                        |    | B3LYP/aVTZ   | 2.2151 | 1.3252 |        |
|                        | Xe | CCSD(T)/aVTZ | 2.3848 | 1.3440 |        |
|                        |    | MP2/aVTZ     | 2.3890 | 1.3537 |        |
|                        |    | B3LYP/aVTZ   | 2.3974 | 1.3268 |        |
|                        | Rn | CCSD(T)/aVTZ | 2.4704 | 1.3449 |        |
|                        |    | MP2/aVTZ     | 2.4743 | 1.3546 |        |
|                        |    | B3LYP/aVTZ   | 2.4885 | 1.3276 |        |

**Table S2** CCSD(T)/aVTZ electron density  $\rho$  ( $e a_0^{-3}$ ), Laplacian of the electron density  $\nabla^2\rho$  ( $e a_0^{-5}$ ), and energy density  $H$  (hartree  $a_0^{-3}$ ) calculated at the BCP on the Ng-X bonds of the HNgBeO<sup>-</sup> and NgBeO

| Species             | Bond  | $\rho(\text{BCP})$ | $\nabla^2\rho(\text{BCP})$ | $H(\text{BCP})$ |
|---------------------|-------|--------------------|----------------------------|-----------------|
| HArBeO <sup>-</sup> | Ar-H  | 0.0171             | 0.0400                     | 0.00015         |
|                     | Ar-Be | 0.0444             | 0.241                      | -0.00387        |
| ArBeO               | Ar-Be | 0.0325             | 0.223                      | 0.00258         |
| HKrBeO <sup>-</sup> | Kr-H  | 0.0207             | 0.0382                     | -0.00107        |
|                     | Kr-Be | 0.0432             | 0.163                      | -0.00913        |
| KrBeO               | Kr-Be | 0.0328             | 0.181                      | -0.00118        |
| HXeBeO <sup>-</sup> | Xe-H  | 0.0269             | 0.0374                     | -0.00275        |
|                     | Xe-Be | 0.0428             | 0.0864                     | -0.01479        |
| XeBeO               | Xe-Be | 0.0333             | 0.136                      | -0.00524        |
| HRnBeO <sup>-</sup> | Rn-H  | 0.0308             | 0.0410                     | -0.00385        |
|                     | Rn-Be | 0.0410             | 0.0467                     | -0.01646        |
| RnBeO               | Rn-Be | 0.0322             | 0.114                      | -0.00641        |

**Table S3** Harmonic vibrational frequencies ( $\text{cm}^{-1}$ ) of the linear HNgBeO<sup>-</sup> and NgBeO computed with the aVTZ basis set. IR intensities ( $\text{km mol}^{-1}$ ) in parentheses

| Species             | Method  | $\nu(\text{Ng-Be})$ | $\nu(\text{Be-O})$ | $\nu(\text{Ng-H})$ | $\delta(\text{Ng-Be-O})^a$ | $\delta(\text{H-Ng-Be})^a$ |
|---------------------|---------|---------------------|--------------------|--------------------|----------------------------|----------------------------|
| HArBeO <sup>-</sup> | CCSD(T) | 318                 | 1508               | 569                | 233                        | 134                        |
|                     | MP2     | 330 (0.4)           | 1472 (124)         | 585 (1284)         | 241 (15)                   | 138 (713)                  |
|                     | B3LYP   | 267 (38)            | 1534 (120)         | 578 (1190)         | 234 (3)                    | 141 (577)                  |
| ArBeO               | CCSD(T) | 272                 | 1536               |                    | 155                        |                            |
|                     | MP2     | 268 (2)             | 1490 (72)          |                    | 160 (64)                   |                            |
|                     | B3LYP   | 270 (1)             | 1590 (146)         |                    | 160 (73)                   |                            |
| HKrBeO <sup>-</sup> | CCSD(T) | 267                 | 1495               | 591                | 250                        | 153                        |
|                     | MP2     | 281 (19)            | 1460 (117)         | 605 (1635)         | 256 (8)                    | 158 (638)                  |
|                     | B3LYP   | 229 (65)            | 1522 (130)         | 607 (1440)         | 259 (44)                   | 150 (459)                  |
| KrBeO               | CCSD(T) | 246                 | 1533               |                    | 155                        |                            |
|                     | MP2     | 243 (1)             | 1488 (77)          |                    | 158 (59)                   |                            |
|                     | B3LYP   | 240 (0.7)           | 1585 (154)         |                    | 157 (68)                   |                            |
| HXeBeO <sup>-</sup> | CCSD(T) | 267                 | 1495               | 591                | 250                        | 153                        |
|                     | MP2     | 248 (69)            | 1442 (107)         | 654 (2273)         | 292 (84)                   | 167 (420)                  |
|                     | B3LYP   | 214 (78)            | 1506 (145)         | 648 (1838)         | 296 (86)                   | 155 (312)                  |
| XeBeO               | CCSD(T) | 237                 | 1527               |                    | 150                        |                            |
|                     | MP2     | 233 (0.6)           | 1483 (78)          |                    | 151 (50)                   |                            |
|                     | B3LYP   | 225 (0.2)           | 1577 (159)         |                    | 149 (59)                   |                            |
| HRnBeO <sup>-</sup> | CCSD(T) | 234                 | 1476               | 641                | 286                        | 161                        |
|                     | MP2     | 225 (94)            | 1429 (101)         | 728 (2548)         | 305 (90)                   | 164 (300)                  |
|                     | B3LYP   | 205 (72)            | 1497 (158)         | 720 (1930)         | 302 (79)                   | 158 (243)                  |
| RnBeO               | CCSD(T) | 224                 | 1522               |                    | 145                        |                            |
|                     | MP2     | 221 (0.5)           | 1478 (81)          |                    | 147 (46)                   |                            |
|                     | B3LYP   | 214 (0.2)           | 1572 (165)         |                    | 145 (55)                   |                            |

<sup>a</sup>Doubly-degenerate bending.

**Table S4** CCSD(T)/aVTZ dissociation energies (kcal mol<sup>-1</sup>) of the HNgBeO<sup>-</sup> (reference species)

| Species             |                        | H <sup>-</sup> + NgBeO | H <sup>-</sup> + Ng + BeO | H + Ng + BeO <sup>-</sup> | Ng + HBeO <sup>-</sup> | E <sup>#a</sup> |
|---------------------|------------------------|------------------------|---------------------------|---------------------------|------------------------|-----------------|
| HArBeO <sup>-</sup> | $\Delta E_{\text{el}}$ | 28.1                   | 40.0                      | 7.1                       | -83.1                  | 2.9             |
|                     | $\Delta E$ (0 K)       | 26.7                   | 37.6                      | 4.5                       | -81.4                  | 2.5             |
|                     | $\Delta E$ (298.15 K)  | 26.8                   | 37.6                      | 4.5                       | -82.1                  | 2.0             |
|                     | $\Delta H$ (298.15 K)  | 27.4                   | 38.7                      | 5.7                       | -81.5                  | 2.0             |
|                     | $\Delta G$ (298.15 K)  | 21.0                   | 25.8                      | -7.7                      | -87.3                  | 1.7             |
| HKrBeO <sup>-</sup> | $\Delta E_{\text{el}}$ | 30.3                   | 44.5                      | 11.5                      | -78.7                  | 6.1             |
|                     | $\Delta E$ (0 K)       | 28.8                   | 42.0                      | 8.9                       | -76.9                  | 5.5             |
|                     | $\Delta E$ (298.15 K)  | 29.0                   | 42.0                      | 8.9                       | -77.6                  | 5.0             |
|                     | $\Delta H$ (298.15 K)  | 29.5                   | 43.2                      | 10.1                      | -77.1                  | 5.0             |
|                     | $\Delta G$ (298.15 K)  | 23.0                   | 30.0                      | -3.5                      | -83.0                  | 4.5             |
| HXeBeO <sup>-</sup> | $\Delta E_{\text{el}}$ | 34.3                   | 51.3                      | 18.3                      | -71.8                  | 11.0            |
|                     | $\Delta E$ (0 K)       | 32.6                   | 48.7                      | 15.7                      | -70.2                  | 10.2            |
|                     | $\Delta E$ (298.15 K)  | 32.9                   | 48.8                      | 15.7                      | -70.9                  | 9.9             |
|                     | $\Delta H$ (298.15 K)  | 33.5                   | 50.0                      | 16.9                      | -70.3                  | 9.9             |
|                     | $\Delta G$ (298.15 K)  | 26.7                   | 36.7                      | 3.2                       | -76.4                  | 9.1             |
| HRnBeO <sup>-</sup> | $\Delta E_{\text{el}}$ | 39.0                   | 56.9                      | 24.0                      | -66.2                  | 14.3            |
|                     | $\Delta E$ (0 K)       | 37.2                   | 54.3                      | 21.2                      | -64.7                  | 13.5            |
|                     | $\Delta E$ (298.15 K)  | 37.5                   | 54.4                      | 21.3                      | -65.3                  | 13.2            |
|                     | $\Delta H$ (298.15 K)  | 38.1                   | 55.5                      | 22.4                      | -64.7                  | 13.2            |
|                     | $\Delta G$ (298.15 K)  | 31.3                   | 42.3                      | 8.8                       | -70.8                  | 12.3            |

<sup>a</sup>Energy barrier for the reaction HNgBeO<sup>-</sup> → Ng + HBeO<sup>-</sup>

**Table S5** MP2/aVTZ dissociation energies (kcal mol<sup>-1</sup>) of the HNgBeO<sup>-</sup> (reference species)

| Species             |                        | H <sup>-</sup> + NgBeO | H <sup>-</sup> + Ng + BeO | H + Ng + BeO <sup>-</sup> | Ng + HBeO <sup>-</sup> | E <sup>#a</sup> |
|---------------------|------------------------|------------------------|---------------------------|---------------------------|------------------------|-----------------|
| HArBeO <sup>-</sup> | $\Delta E_{\text{el}}$ | 28.6                   | 40.3                      | 2.8                       | -84.9                  | 3.1             |
|                     | $\Delta E$ (0 K)       | 27.0                   | 37.8                      | 0.3                       | -83.1                  | 2.6             |
|                     | $\Delta E$ (298.15 K)  | 27.2                   | 37.8                      | 0.3                       | -83.8                  | 2.1             |
|                     | $\Delta H$ (298.15 K)  | 27.8                   | 38.9                      | 1.4                       | -83.2                  | 2.1             |
|                     | $\Delta G$ (298.15 K)  | 21.3                   | 25.9                      | -12.5                     | -89.1                  | 1.9             |
| HKrBeO <sup>-</sup> | $\Delta E_{\text{el}}$ | 30.8                   | 44.7                      | 7.2                       | -80.5                  | 6.3             |
|                     | $\Delta E$ (0 K)       | 29.2                   | 42.1                      | 4.6                       | -78.8                  | 5.6             |
|                     | $\Delta E$ (298.15 K)  | 29.4                   | 42.1                      | 4.6                       | -79.4                  | 5.2             |
|                     | $\Delta H$ (298.15 K)  | 30.0                   | 43.3                      | 5.8                       | -78.9                  | 5.2             |
|                     | $\Delta G$ (298.15 K)  | 23.3                   | 30.1                      | -8.3                      | -84.9                  | 4.6             |
| HXeBeO <sup>-</sup> | $\Delta E_{\text{el}}$ | 34.8                   | 51.4                      | 13.9                      | -73.8                  | 11.1            |
|                     | $\Delta E$ (0 K)       | 33.0                   | 48.7                      | 11.2                      | -72.2                  | 10.3            |
|                     | $\Delta E$ (298.15 K)  | 33.4                   | 48.8                      | 11.3                      | -72.8                  | 10.0            |
|                     | $\Delta H$ (298.15 K)  | 33.9                   | 49.9                      | 12.4                      | -72.2                  | 10.0            |
|                     | $\Delta G$ (298.15 K)  | 27.1                   | 36.6                      | -1.8                      | -78.4                  | 9.1             |
| HRnBeO <sup>-</sup> | $\Delta E_{\text{el}}$ | 39.4                   | 56.8                      | 19.3                      | -68.4                  | 14.6            |
|                     | $\Delta E$ (0 K)       | 37.5                   | 54.0                      | 16.5                      | -66.9                  | 13.7            |
|                     | $\Delta E$ (298.15 K)  | 37.8                   | 54.1                      | 16.6                      | -67.5                  | 13.4            |
|                     | $\Delta H$ (298.15 K)  | 38.4                   | 55.3                      | 17.8                      | -66.9                  | 13.4            |
|                     | $\Delta G$ (298.15 K)  | 31.5                   | 41.9                      | 3.6                       | -73.1                  | 14.6            |

<sup>a</sup>Energy barrier for the reaction HNgBeO<sup>-</sup> → Ng + HBeO<sup>-</sup>

**Table S6** B3LYP/aVTZ dissociation energies (kcal mol<sup>-1</sup>) of the HNgBeO<sup>-</sup> (reference species)

| Species             |                        | H <sup>-</sup> + NgBeO | H <sup>-</sup> + Ng + BeO | H + Ng + BeO <sup>-</sup> | Ng + HBeO <sup>-</sup> | E <sup>#a</sup> |
|---------------------|------------------------|------------------------|---------------------------|---------------------------|------------------------|-----------------|
| HArBeO <sup>-</sup> | $\Delta E_{\text{el}}$ | 29.9                   | 41.7                      | 10.4                      | -82.0                  | 4.0             |
|                     | $\Delta E$ (0 K)       | 28.5                   | 39.4                      | 7.9                       | -80.1                  | 3.5             |
|                     | $\Delta E$ (298.15 K)  | 28.6                   | 39.3                      | 7.8                       | -80.9                  | 3.1             |
|                     | $\Delta H$ (298.15 K)  | 29.2                   | 40.5                      | 9.0                       | -80.3                  | 3.1             |
|                     | $\Delta G$ (298.15 K)  | 22.9                   | 27.6                      | -4.8                      | -86.0                  | 2.7             |
| HKrBeO <sup>-</sup> | $\Delta E_{\text{el}}$ | 32.3                   | 45.9                      | 14.6                      | -77.8                  | 7.6             |
|                     | $\Delta E$ (0 K)       | 30.8                   | 43.6                      | 12.1                      | -76.0                  | 6.9             |
|                     | $\Delta E$ (298.15 K)  | 31.0                   | 43.6                      | 12.0                      | -76.7                  | 6.5             |
|                     | $\Delta H$ (298.15 K)  | 31.6                   | 44.7                      | 13.2                      | -76.1                  | 6.5             |
|                     | $\Delta G$ (298.15 K)  | 25.0                   | 31.7                      | -0.7                      | -82.0                  | 5.9             |
| HXeBeO <sup>-</sup> | $\Delta E_{\text{el}}$ | 36.1                   | 52.0                      | 20.7                      | -71.7                  | 12.8            |
|                     | $\Delta E$ (0 K)       | 34.4                   | 49.6                      | 18.1                      | -70.0                  | 11.9            |
|                     | $\Delta E$ (298.15 K)  | 34.7                   | 49.6                      | 18.1                      | -70.7                  | 11.6            |
|                     | $\Delta H$ (298.15 K)  | 35.3                   | 50.8                      | 19.3                      | -70.1                  | 11.6            |
|                     | $\Delta G$ (298.15 K)  | 28.5                   | 37.6                      | 5.2                       | -76.1                  | 10.7            |
| HRnBeO <sup>-</sup> | $\Delta E_{\text{el}}$ | 40.5                   | 57.1                      | 25.8                      | -66.6                  | 15.6            |
|                     | $\Delta E$ (0 K)       | 38.7                   | 54.5                      | 23.0                      | -65.1                  | 14.6            |
|                     | $\Delta E$ (298.15 K)  | 39.0                   | 54.6                      | 23.1                      | -65.7                  | 14.3            |
|                     | $\Delta H$ (298.15 K)  | 39.6                   | 55.7                      | 24.2                      | -65.1                  | 14.3            |
|                     | $\Delta G$ (298.15 K)  | 32.7                   | 42.5                      | 10.2                      | -71.1                  | 13.3            |

<sup>a</sup>Energy barrier for the reaction HNgBeO<sup>-</sup> → Ng + HBeO<sup>-</sup>

**Table S7** CCSD(T)/aVTZ, MP2/aVTZ, and B3LYP/aVTZ optimized bond lengths (Å) and bond angles (°) of the HNgBeO<sup>-</sup> TS

| Ng | Method       | Ng-Be  | Be-O   | Ng-H   | H-Ng-Be | Ng-Be-O |
|----|--------------|--------|--------|--------|---------|---------|
| Ar | CCSD(T)/aVTZ | 2.0269 | 1.3519 | 2.6842 | 114.4   | 163.5   |
|    | MP2/aVTZ     | 2.0191 | 1.3611 | 2.6673 | 113.1   | 163.6   |
|    | B3LYP/aVTZ   | 2.0527 | 1.3368 | 2.7050 | 111.8   | 162.6   |
| Kr | CCSD(T)/aVTZ | 2.1815 | 1.3527 | 2.8188 | 103.7   | 161.8   |
|    | MP2/aVTZ     | 2.1743 | 1.3618 | 2.7968 | 102.8   | 161.9   |
|    | B3LYP/aVTZ   | 2.2103 | 1.3373 | 2.8417 | 102.5   | 161.3   |
| Xe | CCSD(T)/aVTZ | 2.3689 | 1.3537 | 2.9587 | 94.5    | 160.8   |
|    | MP2/aVTZ     | 2.3649 | 1.3627 | 2.9289 | 93.9    | 160.9   |
|    | B3LYP/aVTZ   | 2.3997 | 1.3379 | 2.9851 | 94.2    | 160.7   |
| Rn | CCSD(T)/aVTZ | 2.4681 | 1.3548 | 2.9486 | 91.6    | 161.2   |
|    | MP2/aVTZ     | 2.4603 | 1.3638 | 2.9228 | 89.9    | 161.1   |
|    | B3LYP/aVTZ   | 2.5061 | 1.3390 | 2.9774 | 90.1    | 161.1   |
